# Supplementary material for: Rubicon and PLEKHM1 Negatively Regulate the Endocytic/Autophagic Pathway via a Novel Rab7-binding Domain
Source: PubMed Central journal article supplement — Mol Biol Cell. 2010 Dec 1;21(23):4162–72. doi: 10.1091/mbc.E10-06-0495 (PMC2993745; doi:10.1091/mbc.e10-06-0495), 2010-12-01
Supplement: E10-06-0495_1.pdf [file E10-06-0495_1.pdf]

## **Supplementary Information**

### **Supplementary Methods**

#### **Autophagy induction and autophagosome maturation assay**

Autophagy was induced by starvation. For amino acid and serum starvation, the cells were cultured in Earle's balanced salt solution (EBSS; Sigma) for 2–4 h.

Autophagosome maturation was analyzed by two different methods. One is based on the co-localization of GFP-LC3 with LAMP1 and in another method we measured the RFP-positive ratio in cells transiently expressing tandem fluorescent LC3 (tfLC3) as described before (Kimura *et al.*, 2007). A549 cells stably expressing GFP-LC3 were incubated in nutrient-rich medium and examined by immunofluorescence microscopy using an anti-LAMP1 antibody. The areas of GFP-LC3 and LAMP1 co-localization were counted and are shown as the percentage of LAMP1-positive GFP-LC3.

#### **Assay for Rab7 GAP activity**

Rab7 GAP activity was assayed as previously described (Fukui *et al.*, 1997) with slight modifications. Briefly, lipid-modified Rab7 was incubated for 20 min at 30°C in a reaction mixture (10 µl) containing 25 mM Tris/HCl at pH 8.0, 10 mM EDTA, 5 mM MgCl<sub>2</sub>, 0.5 mM dithiothreitol (DTT), 0.3%

3-[(3-cholamidopropyl)dimethylammonio]-1-propanesulfonic acid, and 2 mM [ $\gamma$ -<sup>32</sup>P]GTP. The reaction was terminated by adding 2.5 µl of 80 mM MgCl<sub>2</sub>. To this mixture, purified recombinant hRubicon (RH domain), hRubicon (FL), PLEKHM1 (RH domain), or PLEKHM1 (FL) in a buffer containing 40 mM Tris/HCl at pH 8.0, 12 mM MgCl<sub>2</sub>, 1 mM DTT, and 2 mM cold GTP was added in a total volume of 50 µl and the reaction mixture was further incubated for 2 min at 30°C. The samples were applied to a nitrocellulose filter, and the radioactivity retained on the filter was determined by Cerenkov counting.

#### **Preparation and purification of recombinant Rab7 using a baculovirus/Sf9 cell system**

The entire coding region of mouse Rab7 cDNA was subcloned into pFASTBAC HTb (Invitrogen). The plasmid was subjected to recombination with the baculovirus genome in DH10BAC (Invitrogen), and the resulting recombinant viral genome was transfected

into Sf9 cells in order to generate recombinant baculovirus. An Sf9 monolayer was infected with the recombinant virus and cultured for 48 h. To prepare the lipid-modified form of Rab7, the cells were then treated with 5 mM mevalonic acid and incubated for 24 h. Lipid-modified His6-tagged Rab7 protein was purified from the membrane fraction of cells by TALON column chromatography (Clontech).

### **Supplementary References**

Geourjon, C. and Deleage, G. SOPMA: Significant improvements in protein secondary structure prediction by consensus prediction from multiple alignments. *Comput. Appl. Biosci.* **11**, 681-684 (1995).

Gille, C. and Frommel, C. STRAP: editor for STRuctural Alignments of Proteins. *Bioinformatics* **17**, 377-378 (2001).

Fukui, K., et al. Isolation and Characterization of a GTPase Activating Protein Specific for the Rab3 Subfamily of Small G Proteins. *J. Biol. Chem.* **272**, 4655–4658 (1997).

Kimura, S., Noda, T. and Yoshimori, T. Dissection of the autophagosome maturation process by a novel reporter protein, tandem fluorescent-tagged LC3. *Autophagy* **3**, 452-460 (2007).

Thompson, J. D., Higgins, D. G. and Gibson, T. J. Clustal-W - Improving the Sensitivity of Progressive Multiple Sequence Alignment through Sequence Weighting, Position-Specific Gap Penalties and Weight Matrix Choice. *Nucleic Acids Res.* **22**, 4673-4680 (1994).

## Figure Legends

### Figure S1. PLEKHM1 and Rubicon specifically interact with Rab7.

(A) Association of PLEKHM1 and Rubicon with Rabs. The interactions between full-length PLEKHM1 or Rubicon and each Rab mutant were analyzed by a yeast two-hybrid analysis. In all cases, two independent colonies were tested. (B) Rab7 interactions in HEK293A cells. Lysates from HEK293A cells expressing GFP-Rab7 mutants and FLAG-PLEKHM1/Rubicon (wild type or CGHL) or the empty vector were immunoprecipitated with an anti-FLAG antibody and then immunoblotted with an anti-GFP antibody.

### Figure S2. Rubicon family proteins and the RH domain.

(A) Rubicon homologous proteins and their structure. The domain structures were revealed by Motif Scan (SBI). Rubicon homologous (RH) domains in each protein are indicated by magenta. (B) Multiple sequence alignment and secondary structure prediction of Rubicon and its closest homologues in the RH domain. The alignment was automatically generated by the program ClustalW (Thompson *et al.*, 1994) and visualized using STRAP (Gille and Frommel, 2001). The consensus secondary  $\alpha$ -helix prediction structures obtained using the SOPMA (Geourjon and Deleag *et al.*, 1995) are shown as green H. NCBI accession codes: *Homo sapiens*, NP\_055502.1 (Rubicon); *Homo sapiens*, NP\_055613.1 (PLEKHM1, KIAA0356); *Homo sapiens*, NP\_997397.1 (DEF8 isoform1); *Homo sapiens*, NP\_079389.2 (C13orf18) and *Homo sapiens*, NP\_001073944.1 (PLEKHM3). The cysteines in the RH domain are represented by yellow. Four asterisks indicate mutation sites for CGHL mutants.

### Figure S3. The effects of PLEKHM1 over-expression.

(A) The effects of PLEKHM1 over-expression on endosomal pH. A549 cells over-expressing the control or PLEKHM1 were treated with LysoTracker-Red, an agent that causes weakly basic amines to selectively accumulate in cellular compartments with a low internal pH, for 1 h. The cells were analyzed by immunofluorescence microscopy using an anti-EEA1 antibody and anti-LAMP1 antibody. Bars indicate 20  $\mu$ m. (B) The effects of PLEKHM1 over-expression on the fusion between autophagosomes and lysosomes. A549 cells stably expressing GFP-LC3 were infected

with adenovirus harboring the control, PLEKHM1 or Rubicon and stained with an anti-LAMP1 antibody. The projected z-stack images obtained by confocal microscopy are shown. Arrows indicate the luminal signal of GFP-LC3 in LAMP1-positive endosomes. Bars represent 20  $\mu\text{m}$ . (C) The effects of over-expression on the size of LAMP1-positive endosome. Cross-sections of LAMP1-positive endosomes were measured by FV1000 software (Olympus) after staining with an anti-LAMP1 antibody. Data are indicated as mean  $\pm$  s.d. ( $n > 30$ ).

**Figure S4. The effects of knockdown on the efficiency of EGF transport to LAMP1-positive endosomes.**

Knocked down cells were treated with Alexa 488 EGF and stained with an anti-LAMP1 antibody at each time point. Arrows indicate EGF-positive dots merged with LAMP1 signals. The percentages of co-localization are shown in Figure 3E. Bars indicate 20  $\mu\text{m}$ .

**Figure S5. The effects of PLEKHM1 knockdown on autophagic pathway.**

(A and B) PLEKHM1 knockdown did not disturb autophagosome-lysosome fusion. (A) A549 cells depleted PLEKHM1 were transfected with tflc3 and subjected to immunostaining with anti-LAMP1 antibody. Bars indicate 20  $\mu\text{m}$ . (B) The percentages of co-localization are shown as red-positive dots/total red dots (mean  $\pm$  s.d.,  $n > 20$ ). (C-D) the effects of PLEKHM1 knockdown on autophagy flux. (C) A549 cells depleted PLEKHM1 were incubated in growth medium, EBSS or EBSS containing protease inhibitors (50 ng/ $\mu\text{l}$  E64d and 50 ng/ $\mu\text{l}$  pepstatin A) for 2 hours and subjected to immunoblotting with anti-LC3 antibody. (D) LC3-II level were quantified and showed as percentages based on (C). N, S and PI show Nutrient condition, Starvation condition and Protease Inhibitors treatment condition, respectively.

**Figure S6. The effects of expressing Rab mutants on Rubicon localization.**

HeLa cells co-expressing mStrawberry-Rubicon and each Rab mutant were examined by confocal fluorescent microscopy. Arrows indicate mStrawberry-Rubicon, which did not co-localize with the Rab proteins in cells expressing the SN mutants. Bars indicate 20  $\mu\text{m}$ .

**Figure S7. The effects of CGHL mutants over-expression.**

(A) Over-expression of PLEKHM1 (CGHL) mutant did not disturb EGFR degradation. A549 cells over-expressed PLEKHM1 were subjected to EGFR degradation assay. Immunodetectable levels of EGFR (relative to  $\alpha$ -tubulin) were shown as mean  $\pm$  s.e.m.. (B and C) Over-expression of CGHL mutant did not affect the formation of GFP-LC3 dots. (B) Rubicon (CGHL) mutant were over-expressed in A549 cells stably expressing GFP-LC3. The cells were treated with EBSS for 2 hours for starvation and subjected to confocal microscopy. Bars indicate 20  $\mu$ m. (C) GFP-LC3 positive dots were counted. Data are indicated as mean  $\pm$  s.d. (n>30). N and S show Nutrient condition and Starvation condition, respectively. (D and E) The effects of over-expression of CGHL mutant on the autophagosome-lysosome fusion. (D) Over-expressed cells were incubated with EBSS containing protease inhibitors (50 ng/ $\mu$ l E64d and 50 ng/ $\mu$ l pepstatin A) for 2 hours. Arrows indicate colocalization signals. (E) The percentages of co-localization are shown as GFP-LC3 /LAMP1 (mean  $\pm$  s.d., n>20).

**Figure S8. Characterization of the Rab7 GAP activity of Rubicon and PLEKHM1.**

(A-E) The hydrolysis of [ $\gamma$ -<sup>32</sup>P]GTP bound to lipid-modified Rab7 was assayed in the presence of various concentrations of recombinant proteins for (A) Rubicon (FL), (B) Rubicon (RH domain), (C) PLEKHM1 (FL), (D) PLEKHM1 (RH domain). (E) Bacterial lysates containing GST (vector) were used as a negative control. (F) The histogram shows the percentage of [ $\gamma$ -<sup>32</sup>P]GTP bound to lipid-modified Rab7 in the presence of 5 pmol of the indicated recombinant proteins. The hydrolysis rates of [ $\gamma$ -<sup>32</sup>P]GTP bound to Rab7 were normalized to the control that did not contain recombinant proteins or bacterial cell lysates (blank).

**Figure S9. PLEKHM1 and Rubicon are in different complexes.**

Cell lysates were subjected to immunoprecipitation and immunoblot analysis using the indicated antibodies. IgG bands and unknown bands were detected by immunoblot analysis with a rabbit anti-Beclin 1 antibody and rabbit anti-PLEKHM1 antibody, respectively.

**Figure S10. The effects of over-expressing the BA domain on autophagy.**

(A) The effects of over-expressing the BA domain (a. a. 393–521) on the number of punctate structures with GFP-LC3. A549 cells stably expressing GFP-LC3 were infected with adenovirus to over-express the control or BA domain and incubated in growth medium or EBSS for 2 h. GFP-LC3-positive punctate structures were counted in more than 30 cells and are shown as the mean  $\pm$  s.d. Bars indicate 20  $\mu$ m. (B) The effects of over-expressing the BA domain on autophagosome maturation. A549 cells stably expressing GFP-LC3 were infected with adenovirus to over-express the control or BA domain and incubated in growth medium containing protease inhibitors (50  $\mu$ g/ml E64d and 50  $\mu$ g/ml pepstatin A) for 4 h. Areas of GFP-LC3 and LAMP1 co-localization were counted in more than 30 cells and are shown as the mean  $\pm$  s.d. Bars indicate 20  $\mu$ m.

A

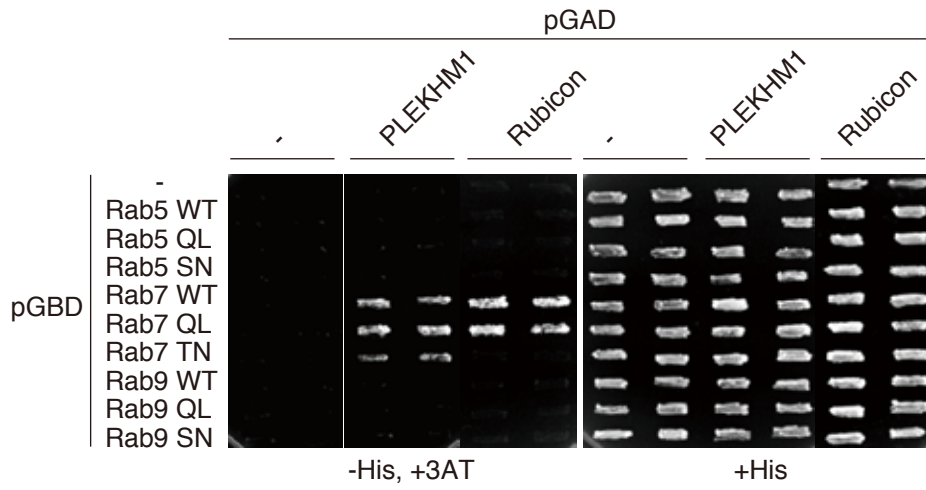

B

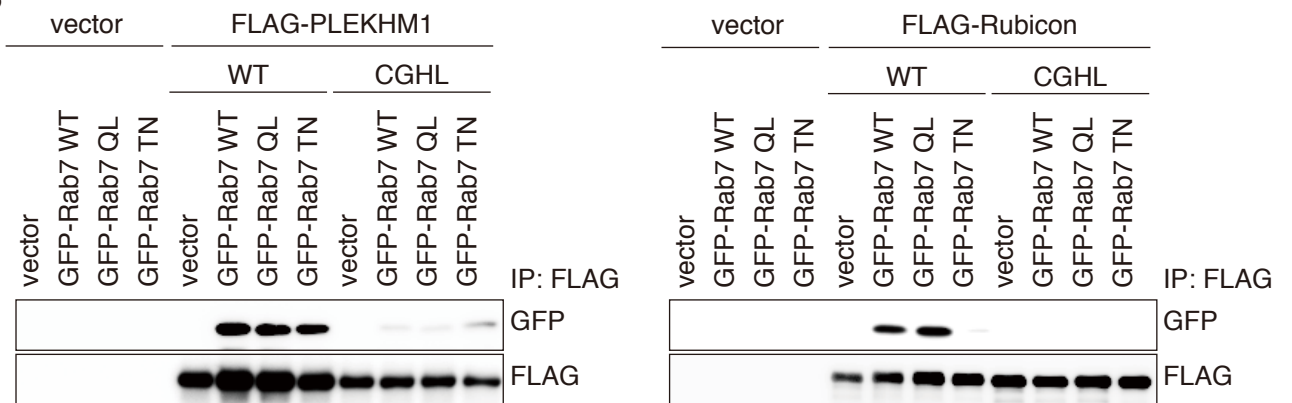

Figure S1.

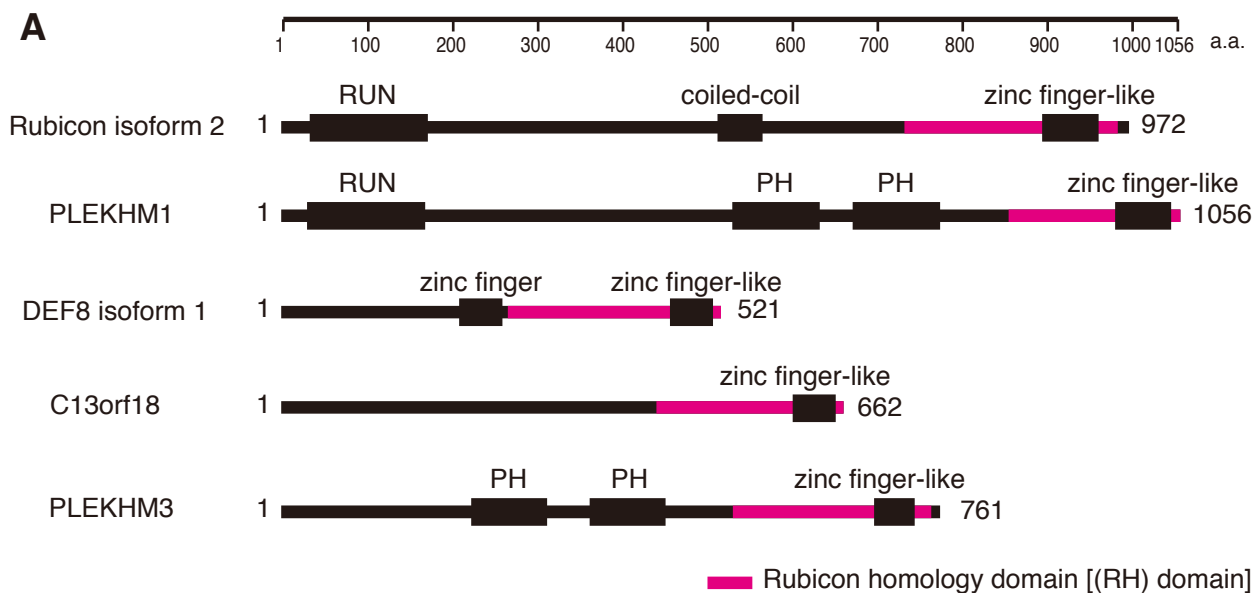

**B**

|                   |     |                 |
|-------------------|-----|-----------------|
| hRubicon isoform2 | 721 | .....CAGCGIRTDP |
| hPLEKHM1          | 831 | .....CAGCSRQIGF |
| hDEF8 isoform1    | 278 | .....CAECRAPISL |
| hC13orf18         | 434 | .....CAGCGTPVEP |
| hPLEKHM3          | 514 | .....CAGCQRSIGL |

---

|                   |     |                                            |
|-------------------|-----|--------------------------------------------|
| hRubicon isoform2 | 731 | D.YIKRLRYCEYLGKYFCQCCHENAQMAIPSRVLRKWDFS   |
| hPLEKHM1          | 841 | S..FVRPKLCAFSGLYCDICHQDDASVIPARI IHNWDLT   |
| hDEF8 isoform1    | 288 | RGVPSEARQCDYTGQYYC SHCHWNDLAVIPARVVHNWDFE  |
| hC13orf18         | 444 | K.FVKRLRYCEYLGKYFCDCCHSYAESCIPARILMMWDFK   |
| hPLEKHM3          | 524 | S..NGKAKVCNYSGWYYCSSCHVDDSF LIPARIVHNWDT S |

---

|                   |     |                                                        |
|-------------------|-----|--------------------------------------------------------|
| hRubicon isoform2 | 770 | HHHHHHHHHHHH KYYVSNFSKDLLIKIWN DPLFNVQDINSALYRKVKLLNQV |
| hPLEKHM1          | 879 | KRPICRQALKFLTQIRAQPLINLQMVNASLYEHVERMHLI               |
| hDEF8 isoform1    | 328 | PRKVSRC SMRYLALMVSRPVLRLREINPL LFSYVEELVEI             |
| hC13orf18         | 483 | KYYVSNFSKQLLDSIWHQPIFNLLSIGQSLYAKAKELDRV               |
| hPLEKHM3          | 562 | KYKVSQAKEFLEYVYEEPLIDIQQENAMLYHHAEP LAAV               |

---

|                   |     |                                                        |
|-------------------|-----|--------------------------------------------------------|
| hRubicon isoform2 | 810 | HHHHHHHHHHHH RLLRVQLCHMKNMFKTCRLAKEL LDSFDTPVG.HLTEDLH |
| hPLEKHM1          | 919 | GRRREQ LKLLGDYLG LCRSGALKELSKRLNHRNYLLESPH             |
| hDEF8 isoform1    | 368 | RKLRQDILLMKPYFITCREAMEARLLLQLQDRQH FVENDE              |
| hC13orf18         | 523 | KEIQEQLFHIKLLKTCRFANSALKEFEQVPG.HLTDELH                |
| hPLEKHM3          | 602 | LRLRQRLKSLRAYLFS CRAAVALRRRIFPREYLLQQI H               |

---

|                   |     |                                                        |
|-------------------|-----|--------------------------------------------------------|
| hRubicon isoform2 | 849 | HHHHHHHHHHHH LYSLNDLTATRK GELGPRLAELTRAGATHVER.CMLCQAK |
| hPLEKHM1          | 959 | RFSVADLQQIADGVYEGFLKALIEFASQHVYH.CDLCTQR               |
| hDEF8 isoform1    | 408 | MYSVQDLLDVHAGRLGCSL TEIHTLFAKH IKLDCERCQAK             |
| hC13orf18         | 562 | LFSLEDLVRIKKGLLAPLLKDILKASLAHVAG.CELCQ GK              |
| hPLEKHM3          | 642 | LYSLADLQQVIEGKLAPFLGKVIKFATSHVYS.CSLCSQK               |

---

|                   |     |                                                                                                                                     |
|-------------------|-----|-------------------------------------------------------------------------------------------------------------------------------------|
| hRubicon isoform2 | 888 | GFI <sup>C</sup> EF <sup>C</sup> QNEDDIIFPFELHKCRT <sup>C</sup> EE <sup>C</sup> KACY <sup>H</sup> KAC <sup>F</sup> KS.              |
| hPLEKHM1          | 998 | GFI <sup>C</sup> QIC <sup>Q</sup> H.HDIIFPFEDT <sup>T</sup> VR <sup>CAE</sup> CK <sup>T</sup> VF <sup>H</sup> QS <sup>C</sup> QAVV  |
| hDEF8 isoform1    | 448 | GFV <sup>C</sup> EL <sup>C</sup> RE.GDVLFPFDSHTS.V <sup>C</sup> AD <sup>C</sup> SAV <sup>F</sup> HR <sup>D</sup> CYYDN              |
| hC13orf18         | 601 | GFI <sup>C</sup> EF <sup>C</sup> Q <sup>N</sup> .TTVIFPFQTATCRR <sup>CSA</sup> CRAC <sup>F</sup> H <sup>K</sup> Q <sup>C</sup> FQS. |
| hPLEKHM3          | 681 | GFI <sup>C</sup> EI <sup>C</sup> NN.GEILYPFEDISTSR <sup>CES</sup> CGAV <sup>F</sup> H <sup>S</sup> E <sup>C</sup> KEK.              |

---

|                   |      |                                                                                      |
|-------------------|------|--------------------------------------------------------------------------------------|
| hRubicon isoform2 | 927  | HHHHHHHHHHHH .GSC <sup>PR</sup> CERLQARREALARQSLESYLSDYEEEPAEALALE AAVLEAT           |
| hPLEKHM1          | 1037 | KKG <sup>C</sup> PR <sup>C</sup> ARRRKYQE <sup>N</sup> IFA                           |
| hDEF8 isoform1    | 486  | STT <sup>C</sup> PK <sup>C</sup> ARLSLRKQSLFQEPGPDVEA                                |
| hC13orf18         | 639  | .SE <sup>C</sup> PR <sup>C</sup> ARITARRKLLSVASAAT                                   |
| hPLEKHM3          | 719  | SVP <sup>C</sup> PR <sup>C</sup> VRRRELQKKQKSF <sup>W</sup> QRLNMDESLEEACTMFELSY QNT |

Figure S2.



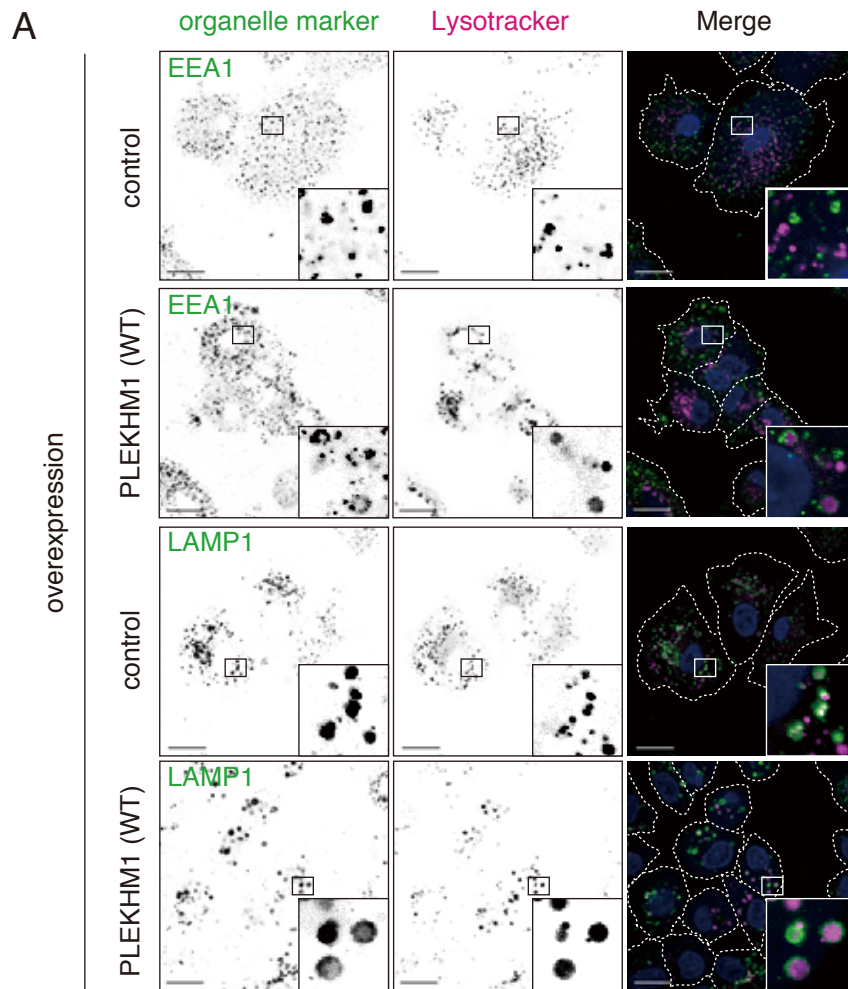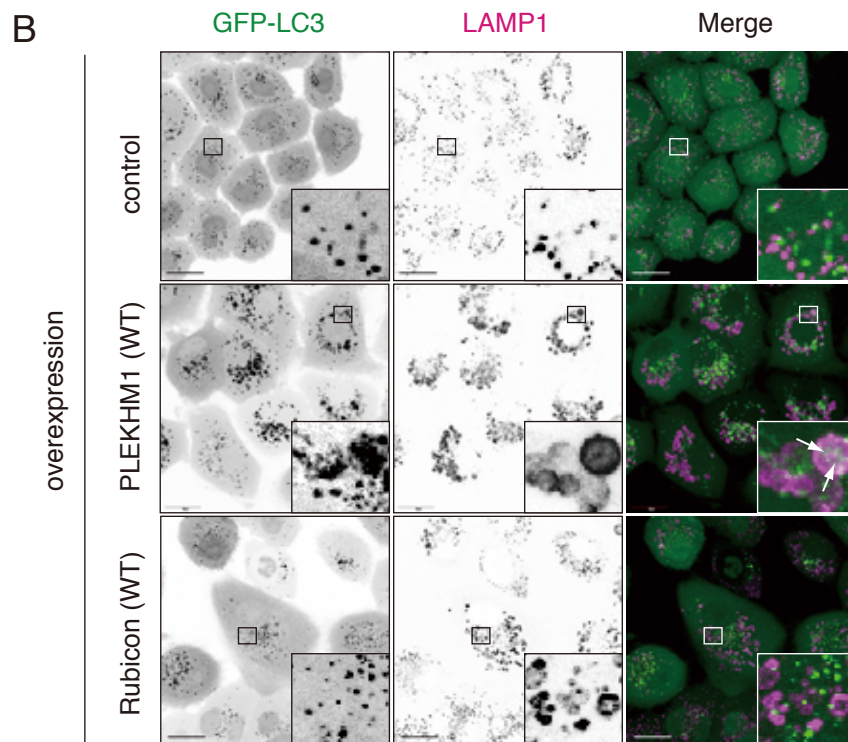

Figure S3.

C

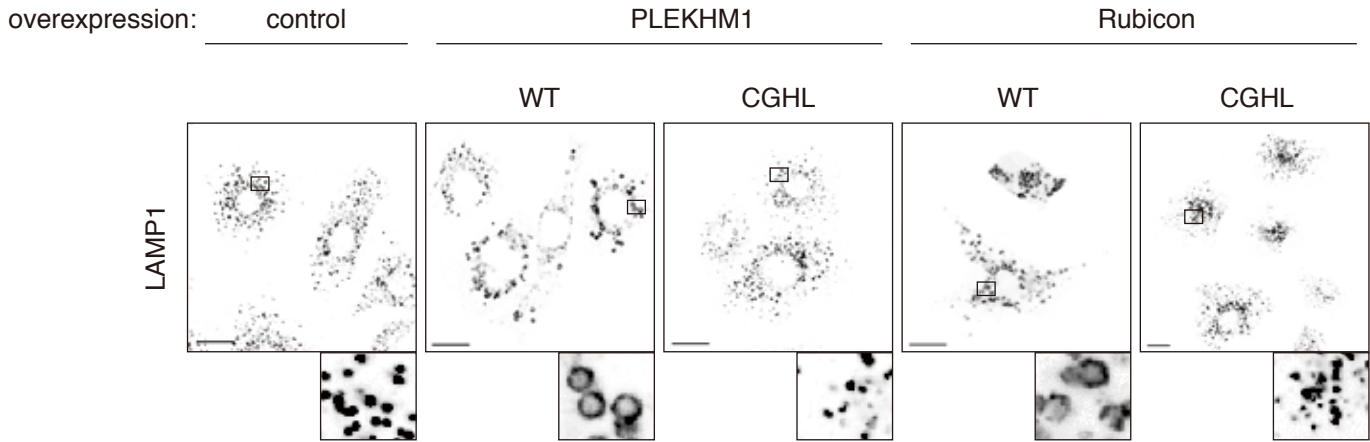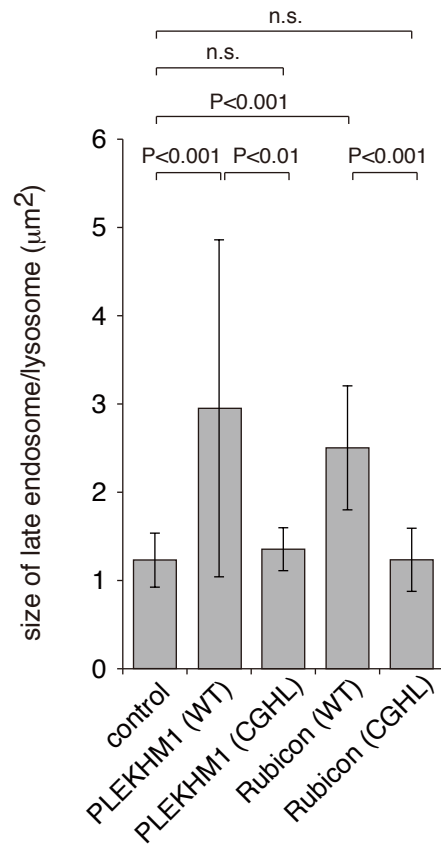

Figure S3.\_continued

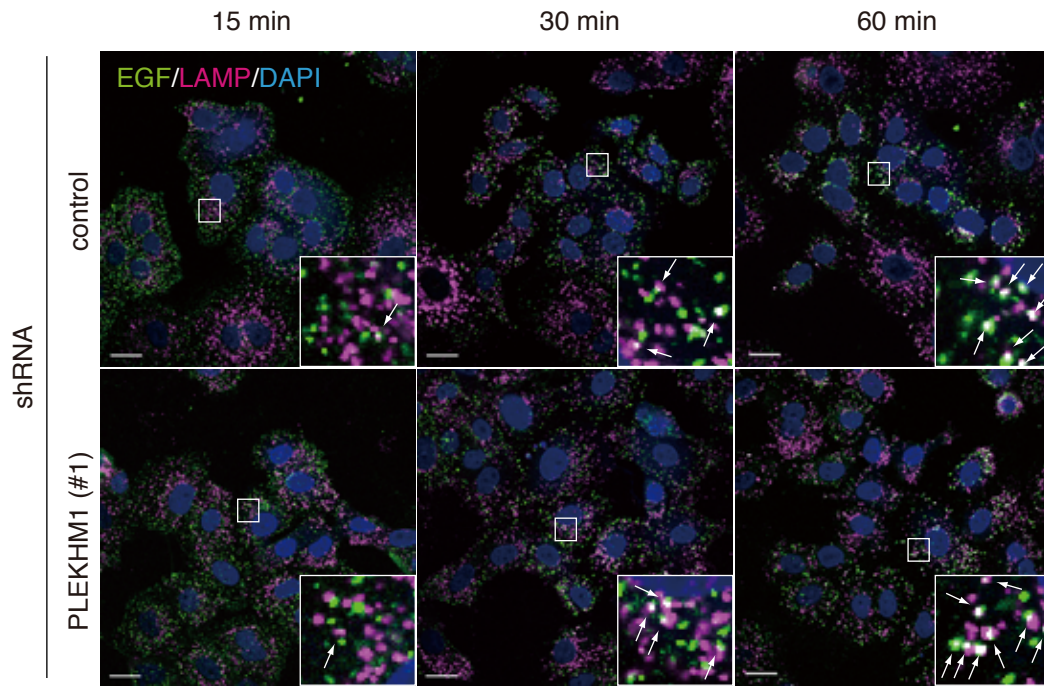

Figure S4.

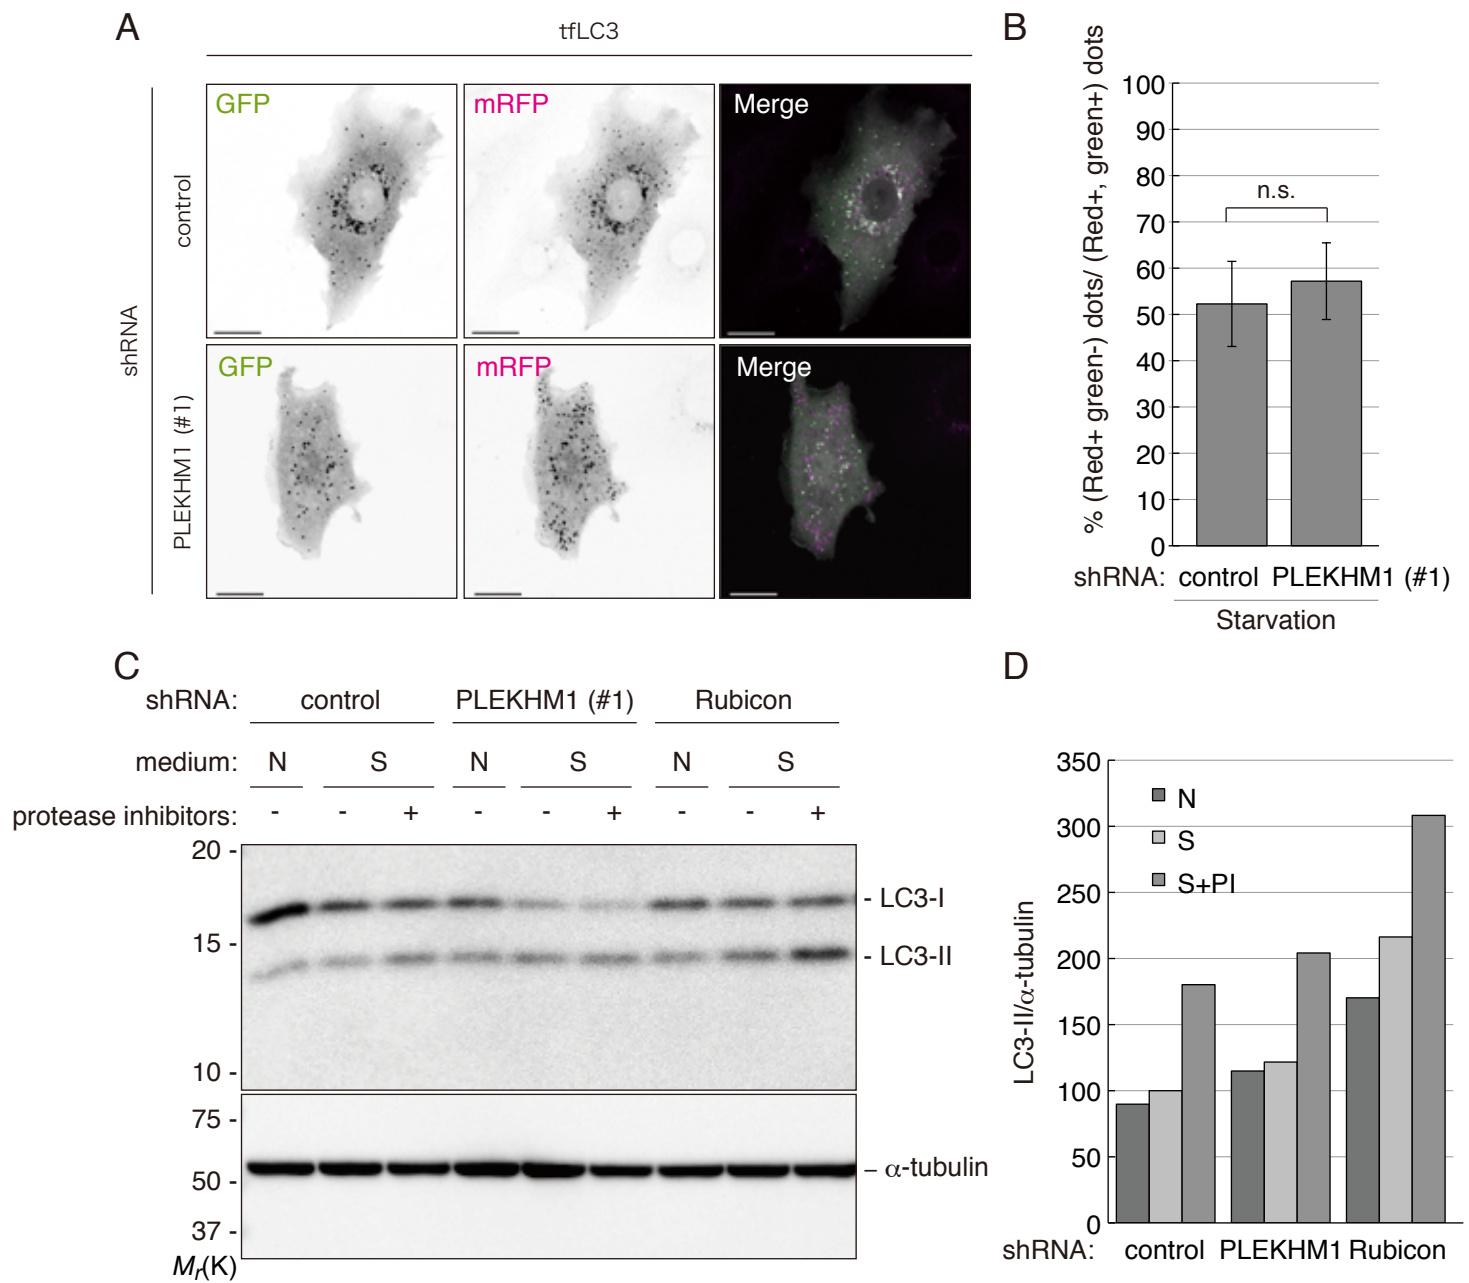

Figure S5.

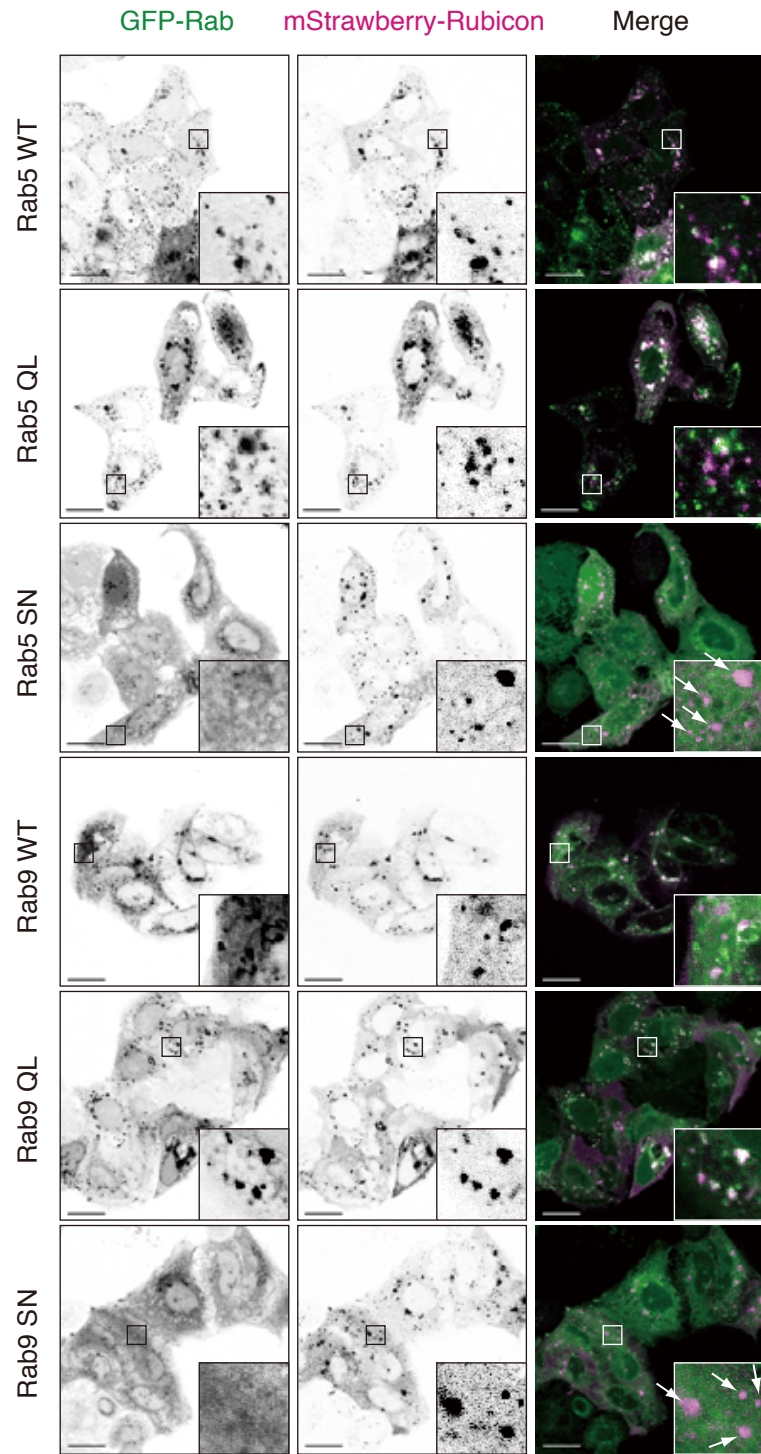

Figure S6.

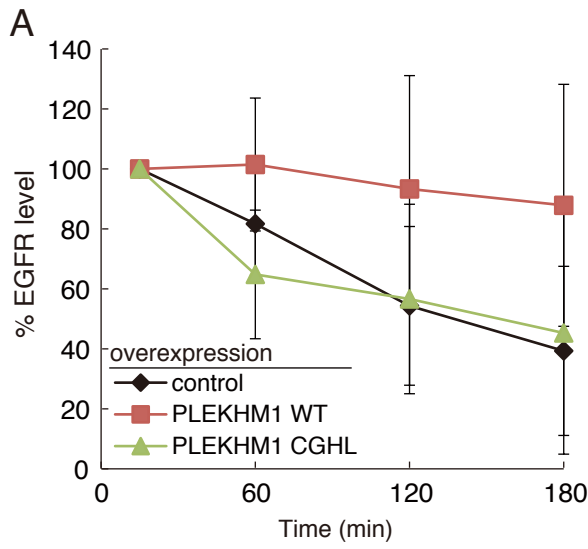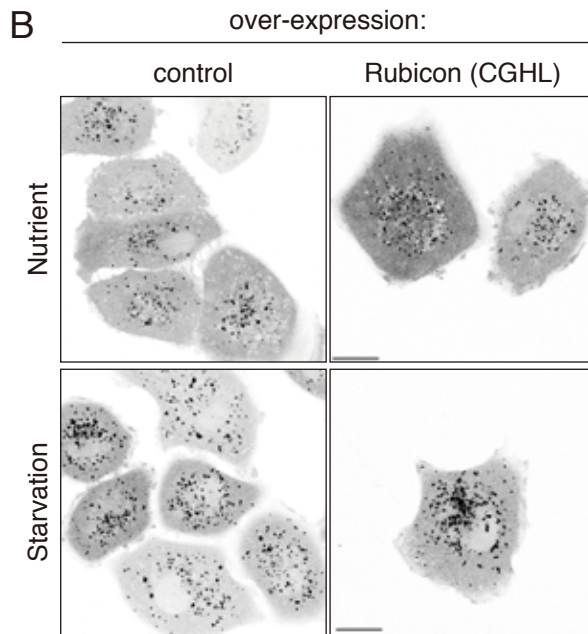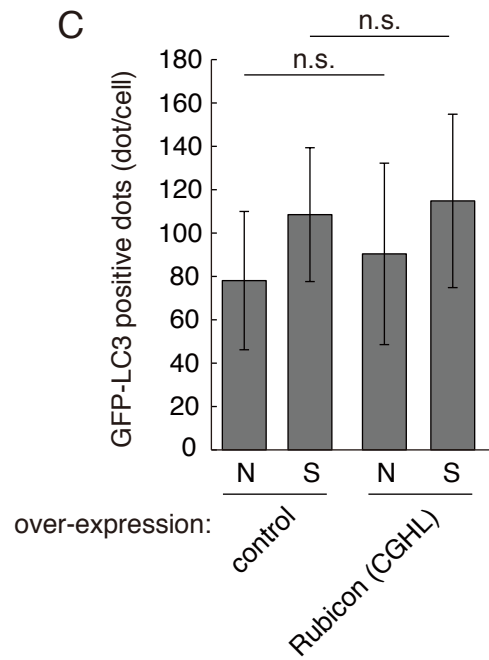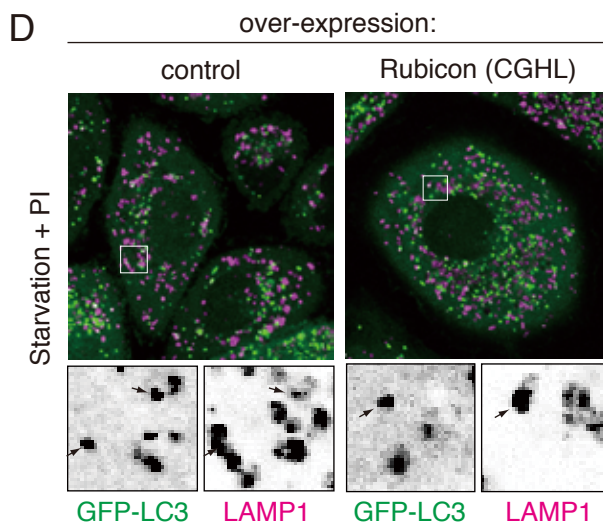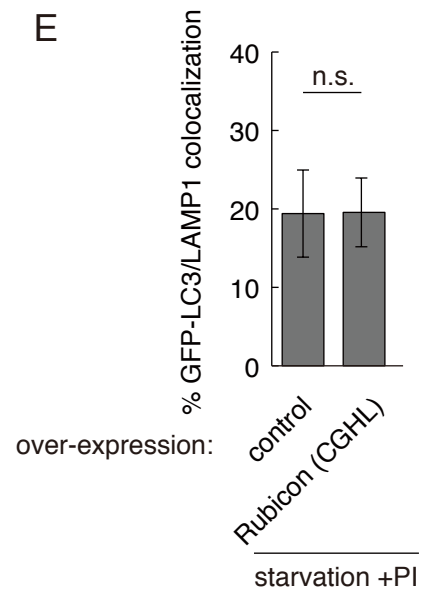

Figure S7.

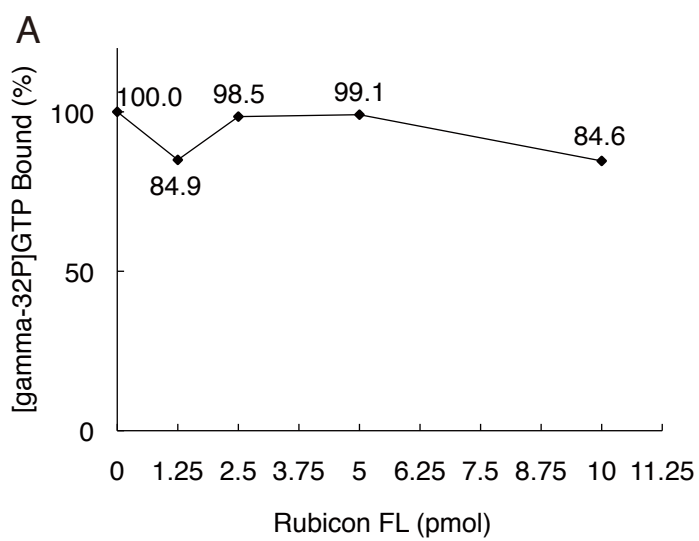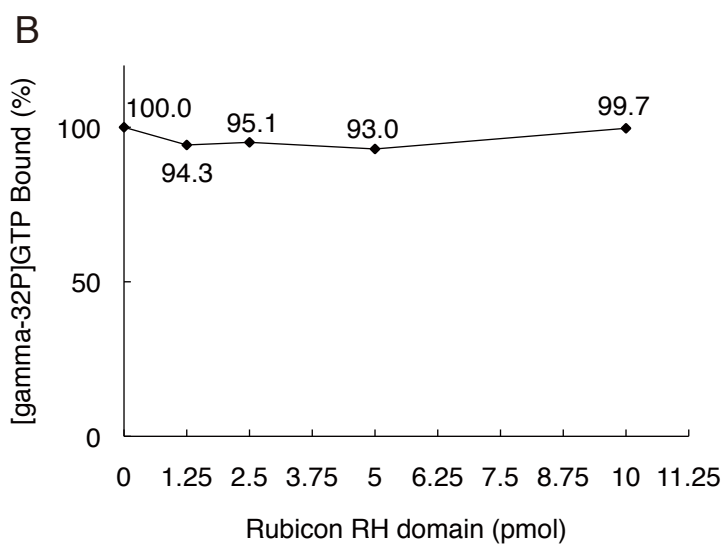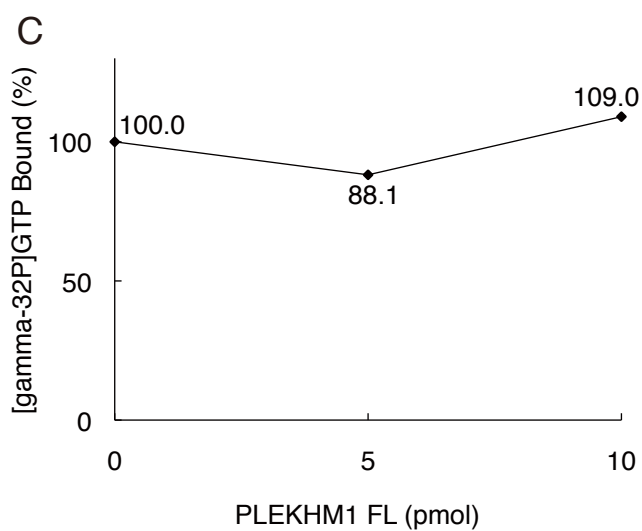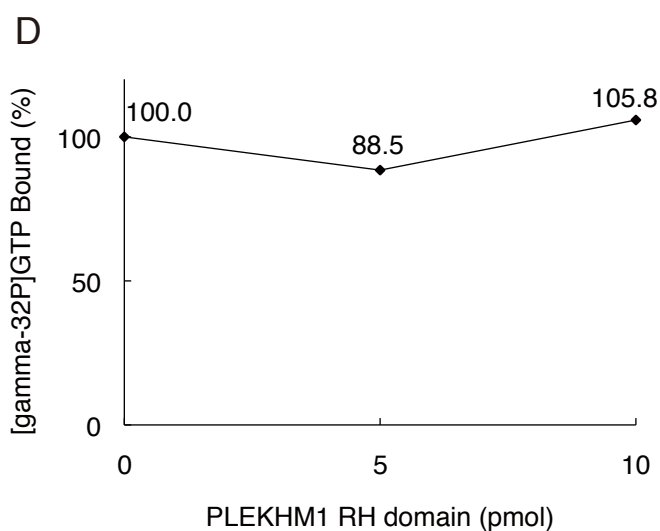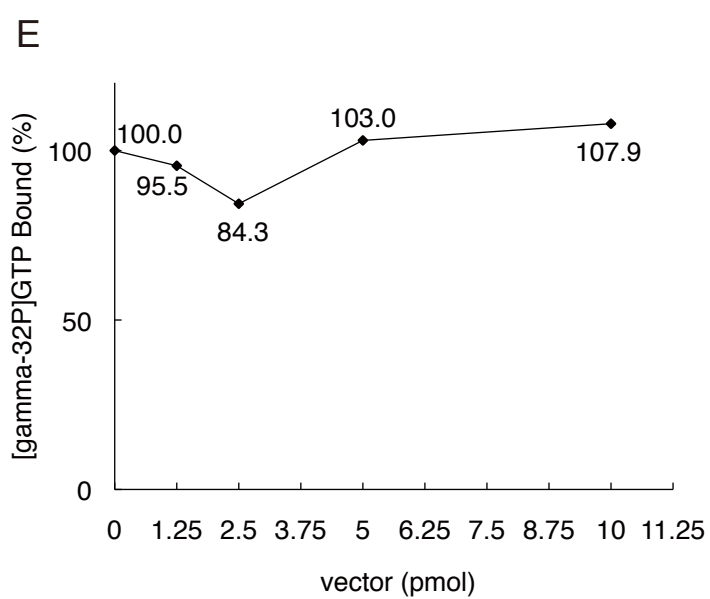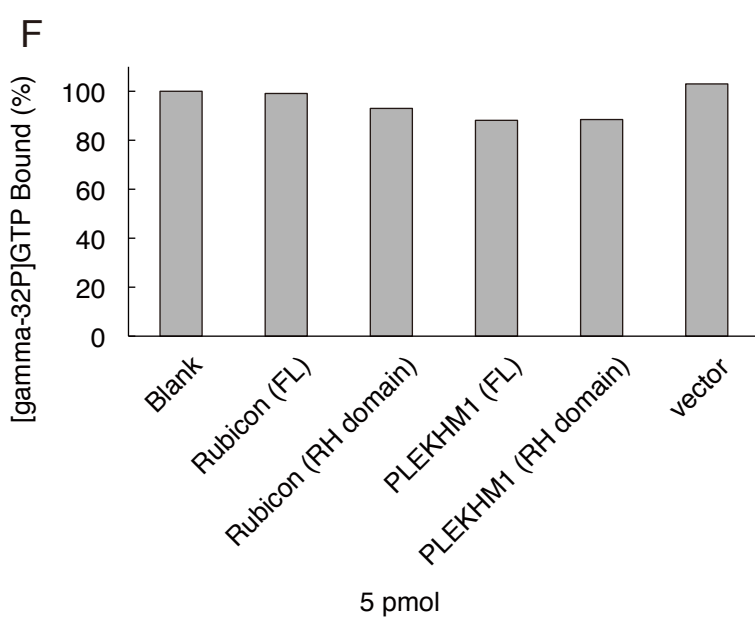

Figure S8.

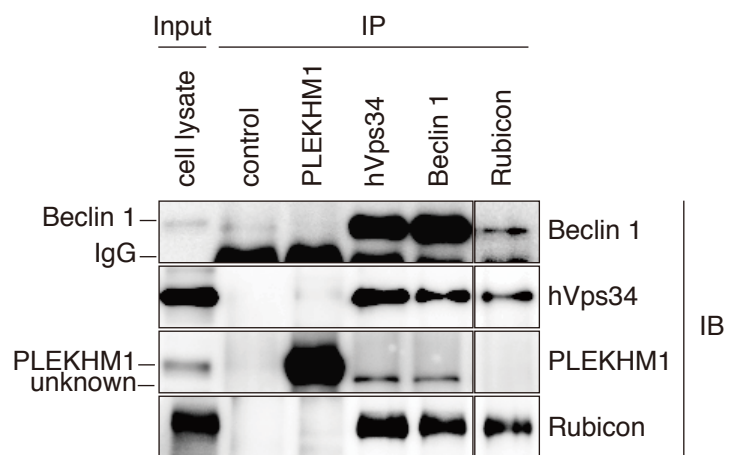

Figure S9.



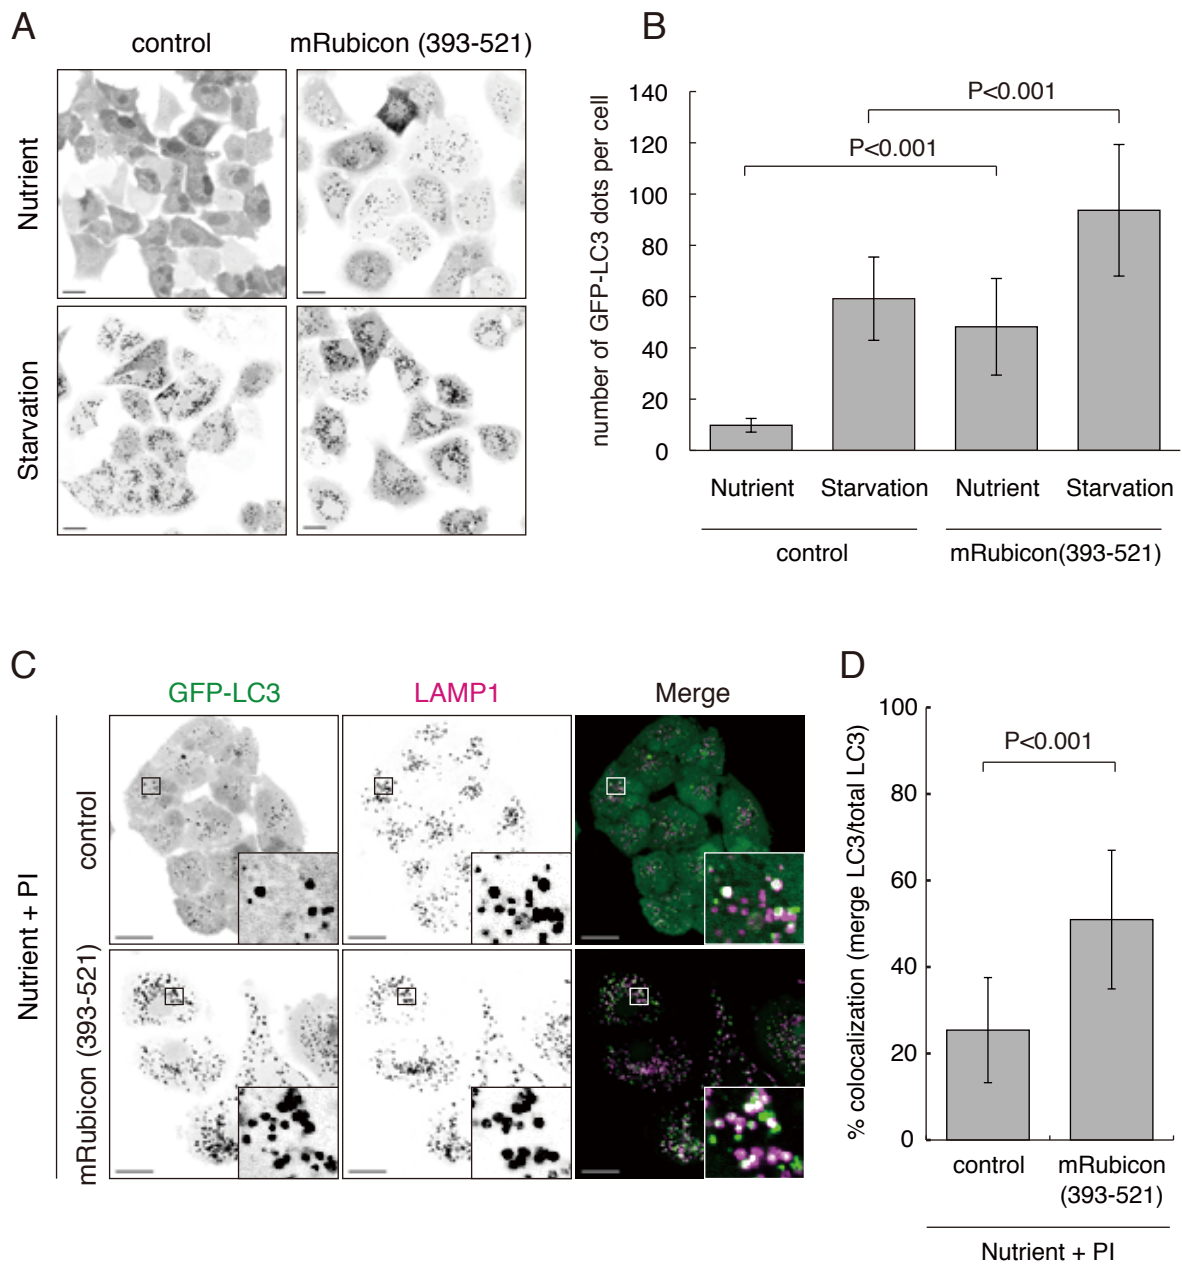

Figure S10.
